# 1 **Object manifold geometry across the mouse cortical visual** 2 **hierarchy**

3 Emmanouil Froudarakis<sup>1,4,5\*</sup>, Uri Cohen<sup>2</sup>, Maria Diamantaki<sup>1</sup>, Edgar Y. Walker<sup>4,6</sup>, Jacob Reimer<sup>4,5</sup>, Philipp  
4 Berens<sup>5-7</sup>, Haim Sompolinsky<sup>2,3</sup>, Andreas S. Tolias<sup>4,5,8\*</sup>

5 <sup>1</sup>Institute of Molecular Biology and Biotechnology, Foundation for Research and Technology Hellas,  
6 Heraklion, Greece

7 <sup>2</sup>Edmond and Lily Safra Center for Brain Sciences, Hebrew University of Jerusalem, Israel

8 <sup>3</sup>Center for Brain Science, Harvard University, Cambridge, MA, USA

9 <sup>4</sup>Department of Neuroscience, Baylor College of Medicine, Houston, TX, USA

10 <sup>5</sup>Center for Neuroscience and Artificial Intelligence, Baylor College of Medicine, Houston, TX, USA

11 <sup>6</sup>Institute for Ophthalmic Research, University of Tübingen, Germany

12 <sup>7</sup>Department of Computer Science, University of Tübingen, Germany

13 <sup>8</sup>Department of Electrical and Computer Engineering, Rice University, Houston, TX, USA

14 \*To whom correspondence should be addressed; E-mail: [frouman@imbb.forth.gr](mailto:frouman@imbb.forth.gr), [astolias@bcm.edu](mailto:astolias@bcm.edu)

## 15 **Abstract**

16 Despite variations in appearance we robustly recognize objects. Neuronal populations responding to objects  
17 presented under varying conditions form object manifolds and hierarchically organized visual areas are  
18 thought to untangle pixel intensities into linearly decodable object representations. However, the associated  
19 changes in the geometry of object manifolds along the cortex remain unknown. Using home cage training we  
20 showed that mice are capable of invariant object recognition. We simultaneously recorded the responses of  
21 thousands of neurons to measure the information about object identity available across the visual cortex and  
22 found that lateral visual areas LM, LI and AL carry more linearly decodable object identity information  
23 compared to other visual areas. We applied the theory of linear separability of manifolds, and found that the  
24 increase in classification capacity is associated with a decrease in the dimension and radius of the object  
25 manifold, identifying features of the population code that enable invariant object coding.

## 26 Introduction

27 Object recognition is an ethologically-relevant task for many animals. This is a challenging problem  
28 because an individual object can elicit myriads of images on the retina due to so-called nuisance  
29 transformations such as changes in viewing distance, projection, occlusion and illumination. The collection of  
30 neural responses associated with a single object is known as the object manifold. A prevailing hypothesis is  
31 that along the visual hierarchy, object manifolds are gradually untangled to produce increasingly invariant  
32 object representations, which are linearly decodable (DiCarlo and Cox, 2007). This hypothesis is primarily  
33 based on work in non-human primates, which is a powerful model to study object recognition especially given  
34 the similarities in visual perception among primates. These studies have revealed that the selectivity for object  
35 identity increases as visual signals are conveyed from primary visual cortex (V1) to inferotemporal cortex  
36 (Hung et al., 2005; Rust and DiCarlo, 2010). Despite this significant progress, the underlying changes in the  
37 geometry of the object manifolds along the visual cortical hierarchy that leads to object recognition and a  
38 circuit-level mechanistic understanding of how they are generated remain largely unknown. The mouse animal  
39 model is ideally suited to dissect circuit mechanisms due to its genetic tractability and the numerous methods  
40 available to perform large scale recordings, manipulations and anatomical tracing with cell-type precision  
41 (Fenno et al., 2015; Sofroniew et al., 2016). Therefore developing visually guided behaviors in rodents is  
42 important (Zoccolan et al., 2009) and identifying the relevant network of visual areas involved in object  
43 recognition analogous to the ventral stream of primates is critical. In this direction, we developed an  
44 automatic high-throughput training paradigm and demonstrated that mice can be trained to perform a  
45 two-alternative forced choice (2AFC) object classification task, which is typically used in primates to test  
46 object identification. While visually-guided operant behavioral tasks have been used previously in mice (Hu et  
47 al., 2018; Leger et al., 2013), here we show that mice can also learn to correctly discriminate objects under a  
48 2AFC paradigm. Critically, this capability persisted even when they were presented with previously-unseen  
49 transformation of objects.

50 We simultaneously recorded the activity of thousands of neurons across all cortical visual areas of the  
51 mouse: primary (V1), anterolateral (AL), rostrolateral (RL), lateromedial (LM), lateral intermediate (LI),  
52 posteromedial (PM), anteromedial (AM), posterior (P), postrhinal (POR) and laterolateral anterior (LLA)  
53 visual areas, while presenting images of moving objects undergoing numerous identity-preserving  
54 transformations such as rotation, scale and translation across different illumination conditions. By decoding  
55 the identity of the objects from the recorded neural activity using a linear classifier we found that the lateral  
56 extrastriate visual areas (LM, AL, LI) carried more linearly decodable information about objects identity  
57 compared to V1 and all other higher order areas we studied, consistent with results in rats (Tafazoli et al.,  
58 2017). We used the recently developed theory of linear separability of manifolds and found that in areas LM  
59 and AL the increase in classification capacity is associated with improved manifold geometry, where both the  
60 manifold radii and dimensions are reduced compared to other visual areas. Additionally, by recording  
61 simultaneously from many visual areas, we found that the population dynamics differed across the visual

62 hierarchy, where information about object identity accumulated faster in areas which are more object selective  
63 compared to V1.

## 64 **Results**

65 We generated rendered movies of 3D objects by varying their location, scale, 3D pose and illumination in a  
66 continuous manner across time (**Fig. 1a, Supp. Movie 1**). We developed a 2AFC automatic home cage  
67 training system in which water restricted mice had to lick a left or a right port depending on the object that  
68 was shown on a small monitor in front of their cage (**Fig. 1b**). Upon a correct choice animals immediately  
69 received a small amount of water reward. Naive animals initially licked the left and right probes at random,  
70 but within two weeks of training animals learned to preferentially lick the correct port matched to object  
71 identity (**Fig. 1c**) and trained animals maintained consistent performance on the task across days (**Fig. 1d**).  
72 An important property of object recognition is the ability to generalize across views of objects that have never  
73 been seen before. After the animals learned to discriminate objects from the movie clips - which contained a  
74 specific set of object transformations, new movie clips with unique parameters across translation, scale, pose  
75 and illumination, were presented to the animals. We could not detect any differences in performance between  
76 the previously seen object transformations (**Fig.1e**, familiar transformations) and novel object transformations  
77 (**Fig.1e**, novel transformations). This ability to generalize across identity-preserving transformations indicated  
78 that mice learned an internal object-based model and did not rely simply on low-level features of the rendered  
79 movies they observed during training.

80 If mice were capable of discriminating between objects, there should exist a set of areas along their  
81 visual processing hierarchy that can extract this information. It has been suggested that one way of extracting  
82 the object information irrespective of its transformations is to have neural representations for each object that  
83 are untangled, i.e. can be read-out using a linear decoder (DiCarlo and Cox, 2007). To test this idea, we used  
84 transgenic mice expressing GCamp6 in pyramidal neurons and recorded the activity from hundreds of neurons  
85 in each visual areas separately or from thousands of neurons across the whole visual cortical hierarchy of the  
86 mouse using a large field of view microscope (Sofroniew et al., 2016, **Fig. 1f, g**), while the animals passively  
87 viewed the moving objects (**Fig. 1a**). We identified the borders between visual areas using wide-field  
88 retinotopic mapping as previously described (Fahey et al., 2019; Garrett et al., 2014; Wang and Burkhalter,  
89 2007) (**Fig. 1f**). Neurons in all of the identified visual areas showed significantly more reliable responses  
90 when compared to neurons that were not assigned to any visual area, based on the area segmentation (**Supp.**  
91 **Fig. 1a**).

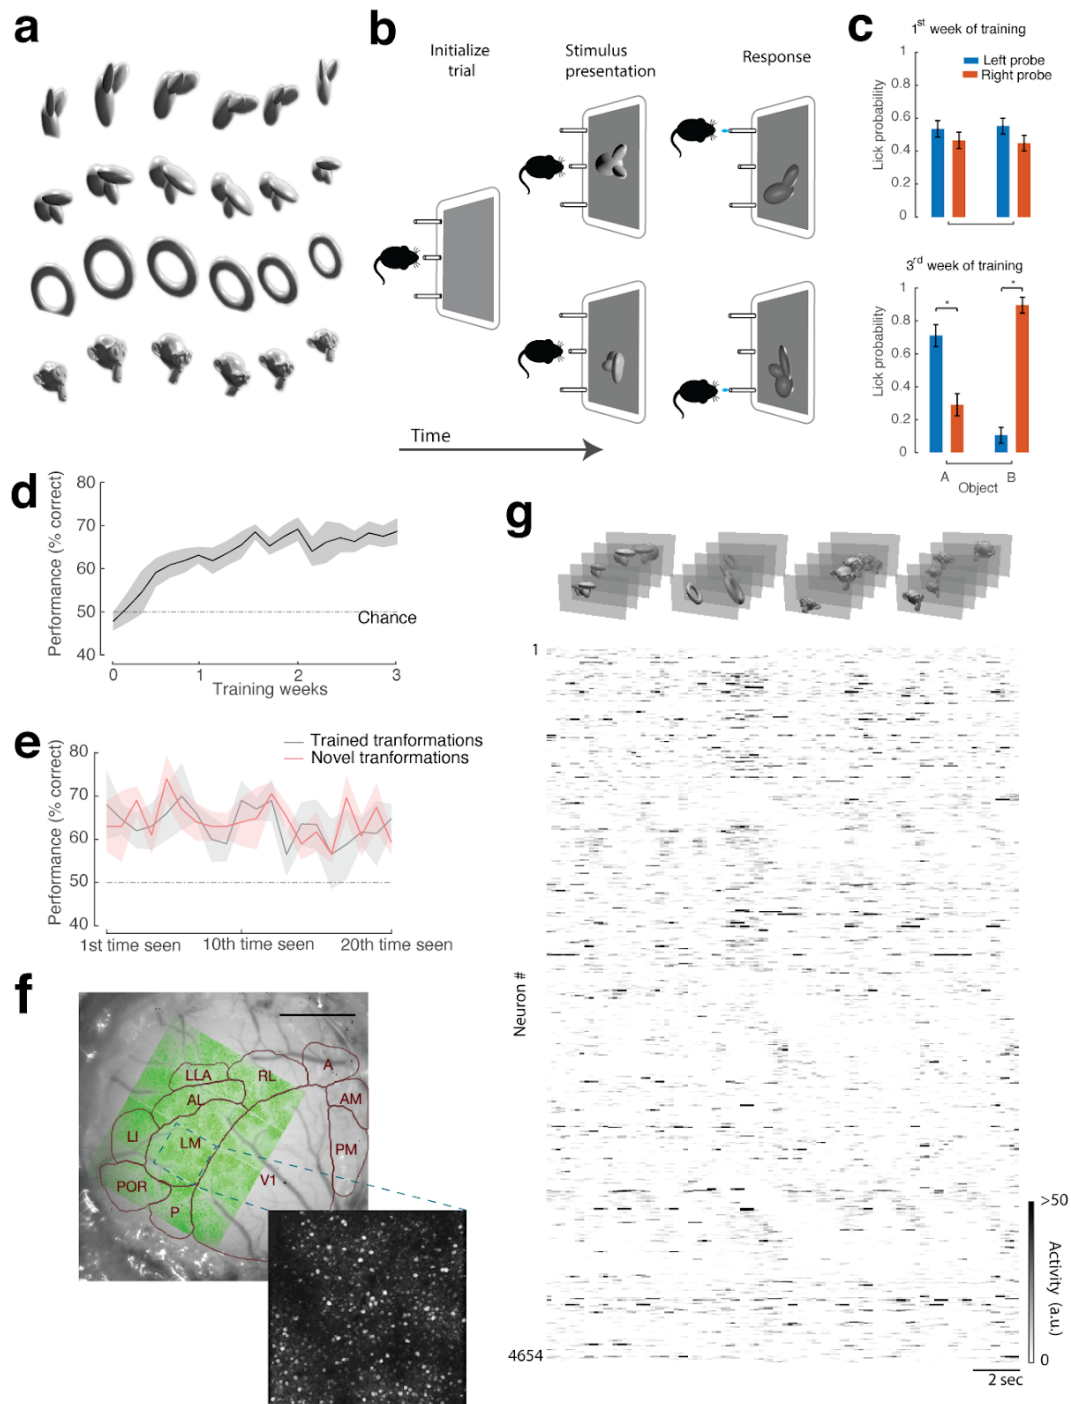

92 **Figure 1: Experimental procedure for behavioral training and two-photon imaging.** (a) Single frames from movies with the  
 93 objects that were presented to the animals. (b) Behavioral training sequence. (c) Probability of licking either probe during the early  
 94 training period (upper barplot) and later training period (lower barplot) for 1 animal. Error bars represent S.E.M. Student t-test \*  $p <$   
 95 0.05 (d) Performance as a function of training time,  $N = 8$  animals. (e) Performance across repetitions of previously seen (gray) and  
 96 previously unseen (red) object trajectories during one session.  $N = 6$  animals. For both (d) and (e) shaded areas represent S.E.M. (f)  
 97 Example large field of view recording (green) with area boundaries overlaid. Scale bar represents 1mm. A small inset depicts the  
 98 two-photon average image for a small segment of the large field of view captured with the mesoscope. (g) Example responses of all  
 99 neurons to moving objects (shown on top) from the recording shown in (f). Each clip is presented for 3-5 seconds before a short pause  
 100 switches to a new clip that might be the same or a different object identity.

101 To measure how linearly discriminable the responses to the different objects were, we used  
 102 cross-validated logistic regression to classify the object identity from the responses of neurons in each visual  
 103 area. As expected, discriminability increased as a function of the number of neurons sampled (**Fig. 2a**), but  
 104 only the higher visual areas, LM, LI and AL, showed consistently higher discriminability levels compared to  
 105 V1 responses (**Fig. 2a, b, c**). In contrast, areas RL, AM, P, POR and LLA had significantly lower  
 106 discriminability levels when compared to V1 (**Fig. 2b**). The differences in decoding between these areas  
 107 persisted at the single neuron as well (**Fig. 2d, Supp. Fig. 2a**).

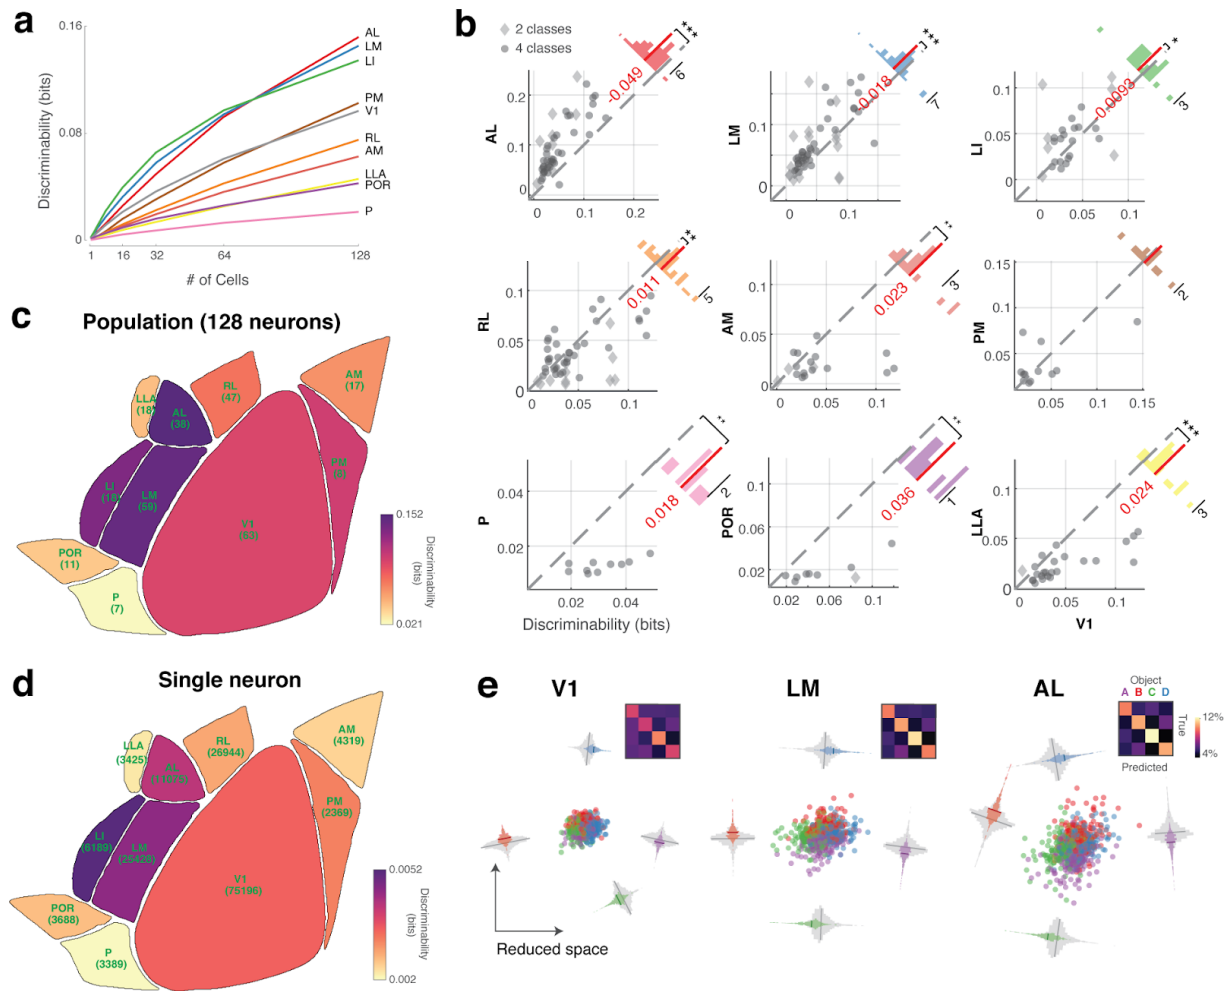

108 **Figure 2: Object identity decoding across the visual hierarchy.** (a) Discriminability of object identity as a function of the number of  
 109 neurons sampled. Each line represents the average across all recorded sites. (b) Scatter plot of the discriminability of different areas  
 110 with a 64 population of neurons compared to V1 for all the recording sites. Insert histogram represents the difference between the  
 111 discriminability of each area and V1. Red line and number indicate the mean difference. Diamonds represent the results with 2 objects  
 112 whereas circles represent the results with 4 objects. Outliers have been omitted for better visualization. Wilcoxon signed rank test \*\*\*  
 113  $p < 0.001$ , \*\*  $p < 0.01$ , \*  $p < 0.05$ . (c) Average discriminability of all visual areas with a 128 population of neurons. The number below  
 114 each area represents the recording sites sampled. (d) Same as in (c) but when using a single neuron at a time to decode the object  
 115 identity. The number below each area represents the cells sampled. (e) Low-dimensional representation of the 128-dimensional neural  
 116 activity space, illustrating the separation of the responses to four different objects for three example areas. Each dot represents the  
 117 average of the activity in one 500msec bin. The side histograms represent the distances of the data projected onto each of the four  
 118 object category axes for the same-class (colored) and different-class (gray). Each insert represents the confusion matrix after decoding.

119 We performed several control analyses: first, our results might be due to differences in the retinotopic  
120 coverage across areas. As has been reported before (Garrett et al., 2014), the coverage of the visual field is  
121 different between visual areas. To control for this, in some experiments we also mapped the receptive fields  
122 (RFs) of all recorded neurons using a dot stimulus (see methods) and repeated our decoding analysis using  
123 only neurons from each area with RF centers within the same ~20 degree area of visual space. When we  
124 restricted our analysis in this way, areas LM, LI and AL still showed significantly higher discriminability  
125 (**Supp. Fig. 2b**). Another potential confound might be differences in receptive field sizes across areas (Murgas  
126 et al., 2020; Wang and Burkhalter, 2007). An area with larger receptive fields might be better at representing  
127 objects simply because more neurons are responding to the object at any moment. Indeed, when we examined  
128 decoding performance conditioned on the object size, we observed an increase in discriminability for all  
129 visual areas as a function of object size (**Supp. Fig. 3a**), in agreement with the increased performance we  
130 found when sampling from more neurons (**Fig. 2a**). However, if changes in receptive field size alone result in  
131 an increase in object discriminability we would expect that area PM that has very large receptive fields  
132 (Murgas et al., 2020) would also have high object discriminability which was not the case in our data (**Fig. 2**).  
133 To further investigate the influence of receptive field size on discriminability, we modeled the effect of  
134 changing receptive field (RF) size in a simulated population of neurons with filters learned by a sparse coding  
135 model. Increasing the size of the receptive fields by either scaling or pairwise linearly combining them (**Supp.**  
136 **Fig. 4a**, see **Methods**) led to either a decrease in discriminability or had no significant effect respectively  
137 (**Supp. Fig. 4b**). These results argue that our *in vivo* results cannot be trivially explained by differences in the  
138 receptive field sizes across visual areas. Additionally, higher visual areas have been reported to have different  
139 temporal frequency selectivities (Andermann et al., 2011; Han et al., 2018; Marshel et al., 2011). To determine  
140 whether the range of speeds that objects were moving in the movies that we showed influenced our results, we  
141 computed the decoding performance for each area as a function of the object speed, but did not find any  
142 significant differences (**Supp. Fig. 3b**). Therefore, we interpret the increase in discriminability in AL, LI, and  
143 LM indicating that these visual areas are specialized for the processing of visual object information with  
144 neural representations that are easier to decode (**Fig. 2e**).



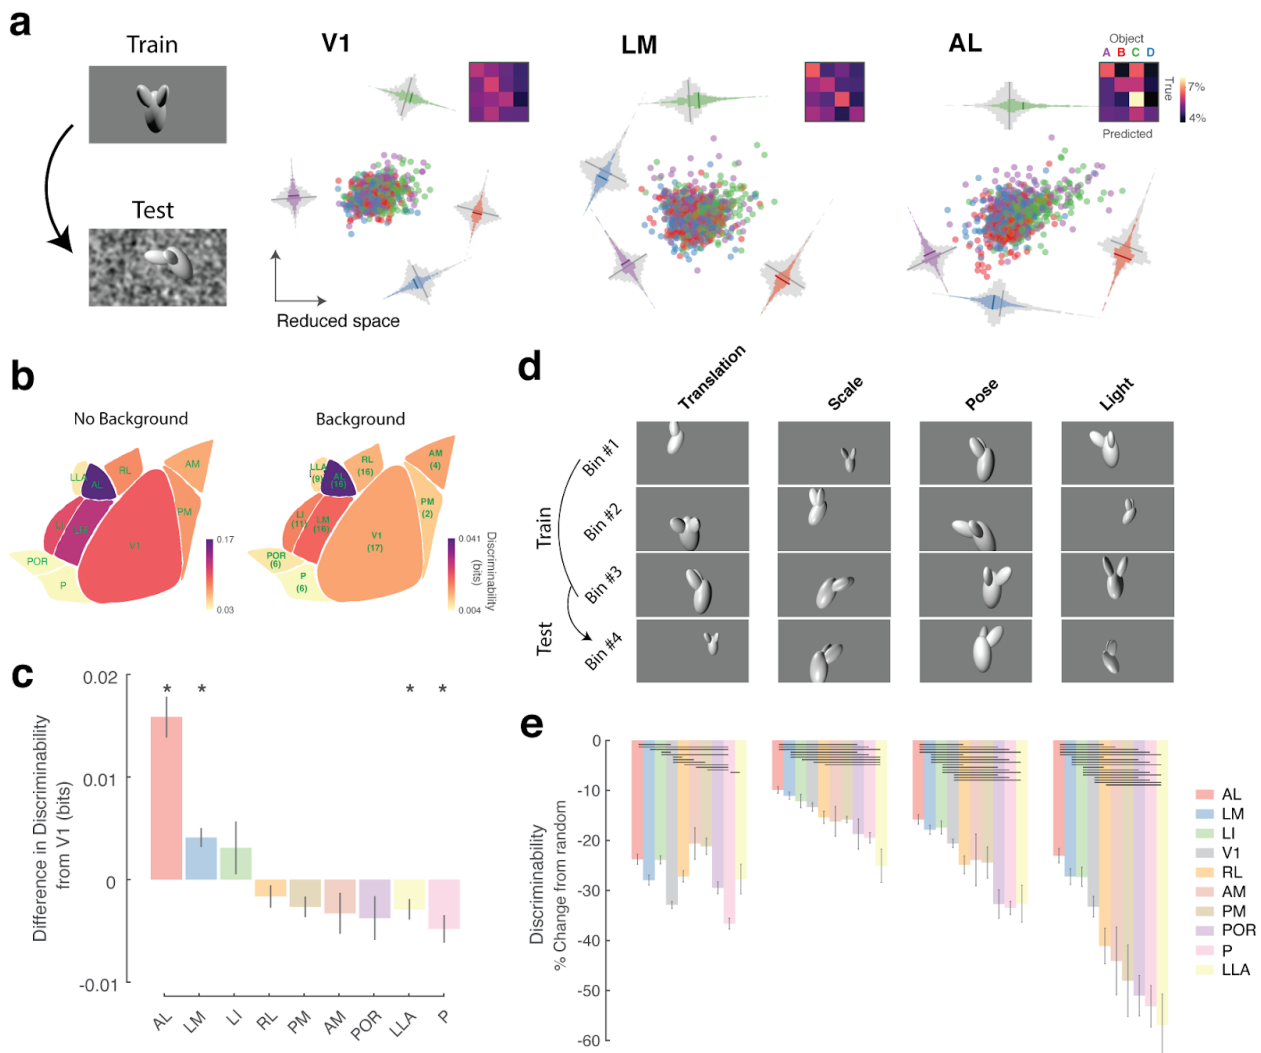

145 **Figure 3: Generalization performance across background noise and identity-preserving transformations.** (a) Generalization test  
 146 across background noise. The decoder was trained on the responses to objects without background and tested on the responses to  
 147 objects that contained background noise. Low-dimensional representation of the responses to the object w/ background are shown on  
 148 the right similar to Figure 2e. Each insert represents the confusion matrix after decoding. (b) Average discriminability of all visual  
 149 areas for objects w/o and w/ background, on the same recorded sites. (c) Barplot indicating the difference in discriminability between  
 150 all visual areas and V1 on the responses to objects w/ background. Kruskal-Wallis with multiple comparisons test  $*p < 0.001$ . (d)  
 151 Example parameter space of the four nuisance classes: Translation (x/y), Scale, Pose (tilt/rotation) and Light (four light sources). The  
 152 decoder was tested on a parameter space of each of the four nuisance variables that had not been part of the training set. (e) Bar plot  
 153 indicating the performance when testing on untrained parameter space, compared to the performance of the random sampling across all  
 154 classes. Lines indicate  $p < 0.05$  Kruskal-Wallis with multiple comparisons test.

155 An important property of visual areas that extract information about object identity is robustness to  
 156 background clutter in the visual scene. To assess the effect of background-clutter, we first trained a logistic  
 157 regression decoder on responses to objects with a gray background as we used previously. We then evaluated  
 158 the performance of the decoder on the responses to movies in which we embedded the objects on top of  
 159 background clutter (**Fig. 3a, Supp. Movie 2**). While the discriminability decreased for all visual areas when  
 160 compared to noise-free stimuli (**Fig. 3b**), areas LM and AL maintained significantly higher discriminability

161 compared to V1 and all other visual areas (**Fig. 3a,b,c**), indicating that in addition to being highly invariant to  
162 changes in the appearance of the object, the object representation in these areas is also more robust than in V1  
163 and other visual areas to clutter. We also studied the relationship between discriminability and reliability of the  
164 neural responses. Although the decoding performance of the objects without the background correlated well  
165 with the reliability of the responses for both V1 and the lateral visual areas, when background noise was  
166 introduced this relationship broke down for V1 but not for the lateral visual areas **Supp. Fig. 1b**).

167       Neurons in an area that is specialized for representing objects should depend less on object parameters  
168 that preserve the identity such as position, scale, pose and illumination conditions (DiCarlo and Cox, 2007;  
169 Hénaff et al., 2019; Rust and DiCarlo, 2010; Tafazoli et al., 2017). As a result, an object decoder built on a  
170 subset of the nuisance parameter space (for example a limited range of translations, sizes, and rotations)  
171 should generalize across nuisance parameters. To test this we split the data into four non-overlapping bins for  
172 each of the nine continuously-varying parameters that defined the object stimulus (for example for the size  
173 object parameter, very small, small, medium, and large objects; **Fig. 3d**), while the remaining parameters were  
174 randomly sampled. For each parameter, we then used data from three of the bins to train the decoder, and  
175 tested the prediction performance on the held-out bin of the data. We compared this performance to a baseline  
176 discriminability using a 4-fold cross validation, when the values for each parameter were randomized before  
177 binning so that the training and test set both spanned the same parameter range. Comparing the out-of-training  
178 set performance to this baseline allowed us to assess the ability of the decoder to generalize, and thus assess  
179 the invariance of the representation in each area (**Supp. Fig. 5, Fig. 3e**; negative values). Areas AL, LM and  
180 LI consistently showed the best generalization performance (smallest reduction in performance for  
181 out-of-training-set condition vs baseline), when changing the scale, pose, light but not translation (**Fig. 3e**).  
182 The larger receptive field sizes of areas PM and AM (Murgas et al., 2020; Wang and Burkhalter, 2007) might  
183 contribute to the improved translation invariance that we observed relative to the other parameters.

184       Chung and colleagues (Chung et al., 2018) recently developed the theory of linear separability of  
185 manifolds and defined a measure called the classification capacity which quantifies how well a neural  
186 population supports object classification. The classification capacity measures the ratio between the number  
187 of objects and the size of the neuronal population that is required for reliable binary classification of the  
188 objects, and is tightly related to the geometry of a neuronal population responding to an object presented  
189 under varying conditions (object manifold). In deep neural networks trained on object classification tasks, it  
190 has been shown that the classification capacity improves along the network's processing stages (Cohen et al.,  
191 2020). Our data, consisting of responses of large neuronal populations in different visual areas to objects  
192 under various transformations, are well suited for applying this method to characterize the object manifolds in  
193 different visual areas. We used the neuronal responses of 64 simultaneously recorded neurons from each  
194 visual area to four objects under the identity-preserving transformations introduced earlier (object position,  
195 scale, pose and illumination conditions, with and without background noise). In agreement with our decoding  
196 results, we found that the classification capacity increased in higher visual areas AL and LM compared to V1,  
197 but decreased in the rest of the areas (**Fig. 4a,b**). The theory of linear separability of manifolds (Chung et al.,



198 2018) also enabled us to characterize the associated changes in the geometry of the object manifolds to  
 199 understand how object invariant representations arise along a processing hierarchy (Cohen et al., 2020) (i.e.  
 200 relate the manifolds' classification ability to the geometry of object manifolds). In particular, classification  
 201 capacity depends on the overall extent of variability across the encoding dimensions, the radius of the  
 202 manifold, but also the number of directions in which this variability is spread, the dimension of the manifold.  
 203 These geometric measures influence the ability to linearly separate the manifolds (**Fig. 4c**). In our results, we  
 204 find that the increase in classification capacity can be traced to changes in the manifolds' geometry, both as a  
 205 decrease of the dimension and radius of object manifolds (**Fig. 4d**).

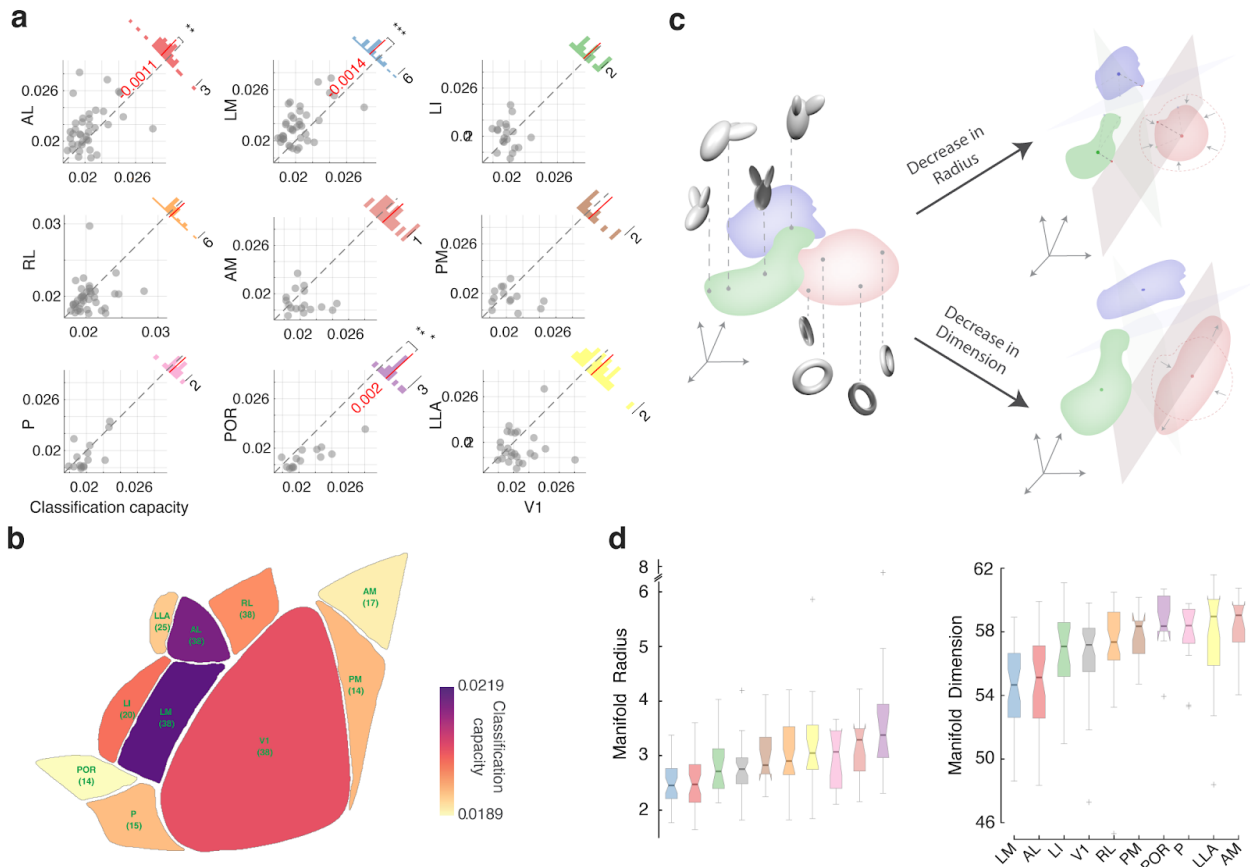

206 **Figure 4: Classification capacity and geometry of manifolds across the visual hierarchy.** (a) Scatter plot of the classification  
 207 capacity of different areas compared to V1 for 4 objects. Insert histogram represents the difference between the classification capacity  
 208 of each area and V1. Red line and number indicate the mean difference. Wilcoxon signed rank test \*\*\*  $p < 0.001$ , \*\*  $p < 0.01$ , \*  $p <$   
 209  $0.05$ . (b) Average classification capacity of all visual areas with a 64 population of neurons. The number below each area represents  
 210 the recording sites sampled. (c) Illustration of low dimensional representations of object manifolds for two visual areas. Left: each  
 211 point in an object manifold corresponds to neural responses to an object under certain identity-preserving transformations. Right:  
 212 demonstration of two possible changes in the manifold geometry in a higher order area, reduction of the radius of one manifold  
 213 through reduction of its extent in all directions (top) and reduction of the dimension of one manifold by concentrating variability at  
 214 certain elongated axis, reducing the spread along other axes. Such changes have predictable effects on the ability to perform linear  
 215 classification of those objects. (d) Box plots of the manifold radius (left), and manifold dimension (right) of all areas, sorted in  
 216 ascending order of the median value.

217 One question that arises is how these visual areas are able to form invariant representations that can  
218 generalize across background noise or nuisance parameters. One way for these areas to optimize the  
219 representations is by taking advantage of the temporal continuity that exists for natural objects by integrating  
220 information over time (DiCarlo et al., 2012; Orlov and Zohary, 2018). We analyzed the temporal dynamics of  
221 the decoding performance of 50 simultaneously recorded neurons for objects overlaid on background noise.  
222 From one trial to the next the nuisance parameters varied continuously but the object identity was preserved  
223 (cis trials) or switched (trans trials) (**Fig. 1g**). When we compared the discriminability as a function of time for  
224 cis/trans trials, we found that indeed in the trials in which the identity of the object was switched (trans trials),  
225 discriminability was overall lower across all visual areas in the early phase of the trials compared to the late  
226 phase of the trials, providing evidence for temporal integration during a trial (**Supp. Fig. 6**). In the late period  
227 discriminability in area AL was significantly closer to the discriminability levels of the cis trials than all the  
228 rest of the visual areas, suggesting that activity in AL more quickly evolved to more disentangled  
229 representations (**Supp. Fig. 6b**, Early/Late).

230 A natural question is what are the dependencies between the representations of objects across multiple  
231 visual areas. If information about object identity propagates across areas, then we expect to see consistent  
232 temporal relationships in the evolution of object discriminability across these areas. We estimated each area's  
233 confidence about the identity of the object at each time point, as the distance of the population activity from  
234 the decision boundary (**Fig. 5a**), and we examined the evolution of this metric across time in each area.  
235 Specifically, we estimated the distance to the decision boundary at different moments within the trial for the  
236 class that was presented. This decision boundary was a linear hyperplane in the 128 dimensional neural  
237 activity space (**Fig. 5a**). We then computed the correlation between the resulting temporal vectors of the score  
238 values across all simultaneously recorded visual areas (**Fig. 5b**, Score Correlation). The highest correlations in  
239 this moment-to-moment discriminability score were between AL, LM, RL and V1 (**Fig. 5c**).

240 Given that activities of neurons across areas can co-fluctuate because of global brain states, these  
241 score correlations could just be the result of raw activity correlations across areas. To test this we computed  
242 the activity correlations between the responses of pairs of neurons across visual areas. We observed a different  
243 correlation pattern that was distinct from the structure of the score correlation (**Fig. 5b**, Score correlations vs  
244 Pairwise activity correlations). Additionally, there are multiple dependencies that can affect the score  
245 correlation between the activity of pairs of areas. In order to measure the strength of the linear relationship  
246 between each pair of areas after adjusting for relationships with the rest of the areas, we computed the partial  
247 score correlations. The correlation pattern remained unchanged with strong dependencies between V1-LM,  
248 V1-RL and LM-AL suggesting that these areas work together as a network of areas specialized for object  
249 recognition (**Fig. 5c**). Interestingly, we did not find a strong relationship between V1-AL (**Fig. 5c**).

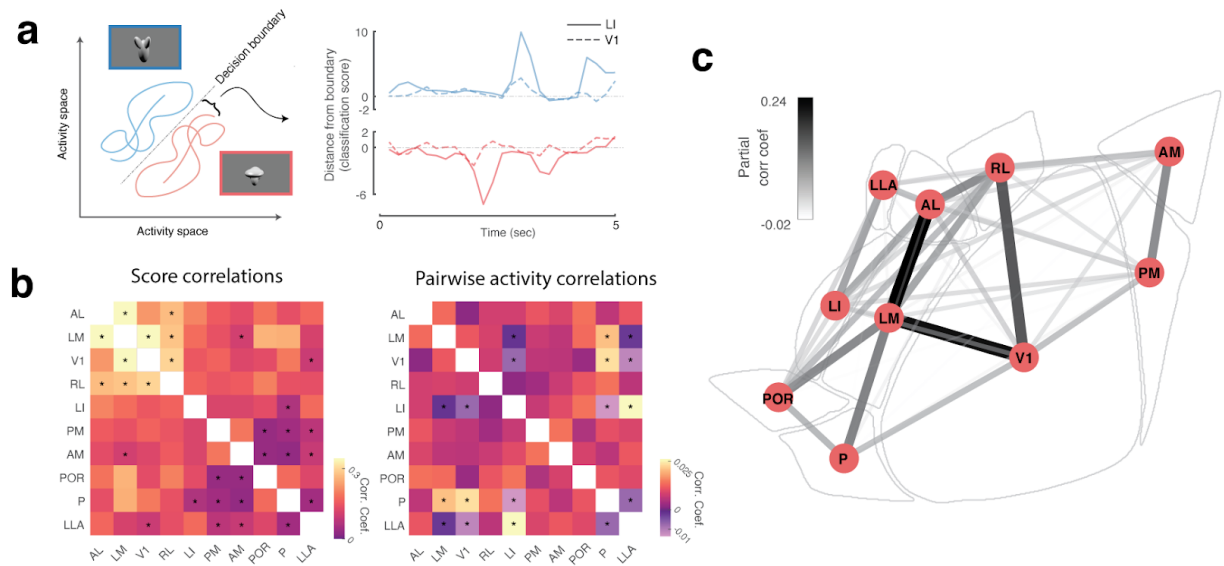

250 **Figure 5: Temporal dynamics and cross-area dependencies.** (a) Schematic representation of the classification scores as the  
 251 distances of the response trajectories to the decision boundary (left) and their resulting temporal dependencies across different areas  
 252 (right). (b) Score correlations across all recorded areas (left) and raw pairwise correlations of the single neuron activity between areas  
 253 (right). Significance was estimated by bootstrapping across all correlations, \* $p < 0.025/45$ . (c) Schematic representation of the score  
 254 partial correlation coefficients between areas.

## 255 Discussion

256 The ability to recognize, discriminate, and track objects across time is evidently a key adaptive trait  
 257 that is fundamental to identifying food items or conspecifics (Jones and Ratterman, 2009) and the ability to  
 258 recognize objects has been observed not only in higher mammals such as humans and monkeys, but also  
 259 rodents, birds, fish and insects (Bevins and Besheer, 2006; Blaser and Heyser, 2015; Newport et al., 2018;  
 260 Soto and Wasserman, 2014; Werner et al., 2016; Zoccolan et al., 2009). While the implementation of how  
 261 information is extracted from the visual scene may vary across species, the computational problem remains  
 262 the same: construct an invariant representation of objects under a wide range of identity-preserving  
 263 transformations. While there is plenty of evidence that mice can detect novel objects (Leger et al., 2013), and  
 264 that mice rely on their vision to hunt crickets (Hoy et al., 2016), until our study there was no direct evidence  
 265 that mice are capable of invariant object recognition.

266 In this work, we showed that mice can be trained to recognize unfamiliar objects in a 2AFC paradigm  
 267 (**Fig. 1**). Similar tasks have been developed for rats (Zoccolan et al., 2009), but mice have not been reported to  
 268 perform such a task. That might be related to the fact that even though mice and rats can achieve similar  
 269 performance levels, mice are slower to train (Jaramillo and Zador, 2014). Our unique training approach  
 270 involves minimal interactions with the animals since the training system is part of their housing. Within a few  
 271 weeks animals learn to discriminate objects and can show generalization across unseen objects poses  
 272 establishing that mice are capable of invariant object recognition (**Fig. 1d**).

273 To identify how animals are able to extract object identity, we analyzed the activity of thousands of  
274 neurons of all known visual cortical areas of the mouse. We found that the decoding performance varied  
275 across the visual hierarchy. A set of lateral visual areas carried more linearly decodable information about the  
276 object identity. Importantly, these areas retain the information about object identity even in difficult visual  
277 conditions such as clutter and generalization across nuisance variability. Our results agree with the hypothesis  
278 that object representations become untangled and more linearly separable as information progresses through  
279 the visual hierarchy; this process might be beneficial as a simple readout mechanism may be employed in  
280 order to use this information to drive behavior. It is important to note that a biologically plausible readout  
281 mechanism would involve sampling only from a small set of neurons in order to extract object identity and  
282 that was our motivation in restricting the access of the decoder to a small sample of neurons. Interestingly,  
283 when computing the information per neuron we find that information also increased progressively across the  
284 lateral hierarchy of V1-LM-LI as has been reported in electrophysiology studies in the rat (Tafazoli et al.,  
285 2017) (**Supp. Fig. 2a**). However, we found that for larger populations area LI carries less information than  
286 LM (**Fig. 2a, b**). This could be due to more redundant information between neurons in LI in the responses to  
287 the specific set of objects used in this study. Therefore, analogous to primates in mice hierarchically organized  
288 visual areas untangle pixel intensities into more linearly decodable object representations.

289 However, the associated changes in the geometry of the object manifold along the visual cortex  
290 remain unknown for any species. To that end, we characterized how the geometry of the object manifolds  
291 changed across the visual hierarchy, using the newly developed theory of linear separability of manifolds  
292 (Chung et al., 2018; Cohen et al., 2020). We found that the two lateral visual areas LM and AL showed  
293 increased classification capacity with manifolds that become smaller and have lower dimensionality (**Fig. 4**).  
294 While the classification capacity and radius of object manifolds has not been previously quantified along the  
295 visual processing hierarchy, our results on the dimensionality of the neural population agree with previous  
296 work. Different methods have been used to quantify the dimensionality of the population responses which also  
297 showed that it decreases along the visual hierarchy of monkeys (Brincat et al., 2018; Lehky et al., 2014).  
298 However, critically the theory of the linear separability of manifolds differs from these previous methods as it  
299 quantifies the geometrical properties of the object response manifolds which contribute to the ability to  
300 perform linear decoding and thus enabled us to determine how the object manifold changes from primary to  
301 higher visual areas in a way which allows for linear decoding of objects using smaller number of neurons.

302 The higher visual areas of the mouse (Glickfeld and Olsen, 2017; Wang and Burkhalter, 2007), have  
303 distinct spatio-temporal selectivities (Andermann et al., 2011; Marshel et al., 2011) and project to different  
304 targets (Wang et al., 2012). Based on these differences in their selectivities, projection and chemoarchitectonic  
305 patterns, efforts have been made to separate areas into ventral and dorsal pathways analogous to those  
306 described in primates (Smith et al., 2017; Wang et al., 2012, 2011; Wang and Burkhalter, 2013). Specifically,  
307 areas such as LM, LI, P and POR areas are hypothesized to comprise the ventral stream whereas areas AL,  
308 RL, AM and PM comprise the dorsal stream. In rats, lateral visual areas LM, LI and LL have been shown to  
309 carry progressively more information about objects (Tafazoli et al., 2017; Vermaercke et al., 2015, 2014).

310 However, the areas of the mouse that might be involved in extraction of object information are not known. We  
311 found that higher visual areas AL, LM and LI had significantly more information about object identity than  
312 V1, with area AL consistently outperforming all other areas which is not consistent with the current  
313 assumption that AL is part of the dorsal pathway. In line with this, both areas AL and LM show faster  
314 accumulation of information about object identity in noisy conditions (**Supp. Fig. 6**). Moreover, the  
315 correlations in decoding confidence between areas AL and LM we find (**Fig. 5c**) could be the result of  
316 recurrent processes that have been suggested to play a significant role during object recognition (Kar et al.,  
317 2019; Tang et al., 2018, 2014). These object-selective dependencies do not share the same structure as have  
318 been reported with more parametric stimuli (Smith et al., 2017), which could be due to objects having a  
319 statistical structure closer to the preferences of these lateral visual areas.

320 Future experiments are required to determine how these different areas work together to extract  
321 information about objects that might be used to guide behavior. In order to establish a more causal relationship  
322 between visual areas and behavior, it will be important to combine behavioral performance with neural  
323 activity manipulation. Neural networks models and the inception loop methodology will enable the  
324 characterization of the specific features that drive neurons in these different visual areas (Bashivan et al.,  
325 2019; Ponce et al., 2019; Walker et al., 2019).

326 In summary, we offer evidence that mice share similarities with rats and higher mammals in their  
327 ability to recognize objects. We show that sequential visual processing leads to object manifolds with  
328 decreased radius and dimension such that the manifolds are more linearly separable. Given the panoply of  
329 tools available, the mouse has the potential to become a powerful model to dissect the circuit mechanisms of  
330 object recognition.

## 331 **Methods**

### 332 *Animal preparation and two photon imaging*

333 All procedures were approved by the Institutional Animal Care and Use Committee (IACUC) of Baylor  
334 College of Medicine. We used 25 adult mice expressing GCaMP6s in excitatory neurons via either  
335 SLC17a7-Cre, Dlx5-Cre, Ai75, Ai148, Ai162 or CamKII-tTA transgenic lines. Animals were initially  
336 anesthetized with Isoflurane (2%) and a 4~mm craniotomy was made over the right visual cortex as  
337 previously described (Froudarakis et al., 2014). The animals were head-mounted above a cylindrical treadmill  
338 and calcium imaging was performed using Chameleon Ti-Sapphire laser (Coherent) tuned to 920 nm. We  
339 recorded calcium traces by using either a large field of view mesoscope (Sofroniew et al., 2016) equipped  
340 with a custom objective (0.6 NA, 21mm focal length) with a typical field of view of ~2500x2000 $\mu$ m, or a  
341 two-photon resonant microscope (Thorlabs) equipped with a Nikon objective (1.1 NA, 25X) with a typical  
342 field of view or ~500x500 $\mu$ m. Laser power after the objective was kept below ~60mW. We recorded data from  
343 depths of 100–380  $\mu$ m below the cortical surface. Imaging was performed at approximately 5-12~Hz for all  
344 scans. Imaging data were motion corrected, automatically segmented and deconvolved using the CNMF  
345 algorithm (Pnevmatikakis et al., 2016); cells were further selected by a classifier trained to detect somata  
346 based on the segmented cell masks.

### 347 *Behavioral training*

348 The mice are trained in a 2 alternative forced choice task in response to moving objects that are presented on a  
349 small 7” monitor that is located in front of their home cage. The training procedure is illustrated in Figure 1.  
350 Briefly, naive water unrestricted mice are placed in a modified cage that has three ports and a monitor on one  
351 side of the box. The center port has a proximity sensor, and the two other ports on either side of the central  
352 port are used to detect licks and are coupled to a computerized valve-controlled liquid delivery that can deliver  
353 liquid volumes with 1 $\mu$ L resolution. The task is as follows: Mice initiate a trial by placing their snout in close  
354 proximity to the central port for ~200-500msec. A stimulus that can be one of two objects is presented on the  
355 monitor that is ~1.5” in front of the animal. The animal has to report the identity of the object by licking one  
356 of the side ports. Each port is allocated to the identity of the same object throughout the training. If the animal  
357 licks the correct port, then a small water reward ~5-12 $\mu$ l is delivered almost immediately which the animals  
358 consume. A new trial can be started thereafter. If the animal licks the wrong port, a short delay 4-10 seconds is  
359 added and the screen turns black. A new trial can start after the delay. Animals have free access to food, and  
360 the only water that they receive comes from their training. The training periods in which animals can initiate  
361 tasks are restricted to 4-8 hours a day. At the start of the training animals are shown the same clip for each  
362 object that contains the same set of transformations. Once animals reach performance levels, new clips with  
363 unique transformations are added. At the end of their training they have seen between 10-20 unique 10s clips  
364 of unique object transformations. For the generalization test, at the start of a new session a whole new set of  
365 10 clips are used for each object and the performance was compared to the session that preceded.



### 366 ***Visual area identification***

367 We generated retinotopic maps of all the visual areas using widefield imaging. The signals from GCamp6s  
368 were captured using either a custom epifluorescence setup or two-photon imaging. For the epifluorescence,  
369 brain was illuminated with a high power LED (Thorlabs) and the emitted signal was bandpass filtered at nm  
370 and captured at a rate of 10 Hz with a CMOS camera (MV1-D1312-160-CL, PhotonFocus). For the  
371 two-photon retinotopic mapping we sampled the activity from a 2.4x2.4mm area with large field of view two  
372 photon microscope (Sofroniew et al., 2016) at a rate of ~5Hz. We stimulated with upward and rightward  
373 drifting white bars (speed: 9-18deg/sec, width: 10-20deg) on black background that had their size and speed  
374 constant relative to the mouse perspective as previously described. Additionally, within the bar we had drifting  
375 gratings with a direction opposite to the movement of the bar. Images from either the epifluorescent or the  
376 two-photon setups were analyzed by a custom-written code in MATLAB to construct the 2D phase maps for  
377 the two directions. We used the resulting retinotopic maps to identify the borders and delineate the visual areas  
378 as previously described (Garrett et al., 2014; Wang and Burkhalter, 2007).

### 379 ***Stimulus generation and visual stimulation***

380 In this study we used four synthesized three-dimensional objects that were rendered in Blender  
381 ([www.blender.org](http://www.blender.org)). Two of the objects were built to match the objects used in (Zoccolan et al., 2009) and the  
382 other two were already existing models within Blender. We varied the following parameters of the objects: X  
383 and Y location (Translation), magnification (Scale), tilt and axial rotation (Pose) and variation of either the  
384 location or energy of 4 light sources (Light). The different object parameters were varied continuously over  
385 time in order to generate a cohesive object motion. Objects were rendered either on a gray background, or on a  
386 gaussian noise pattern with a fixed seed between objects. The long rendered movie was split into smaller 10  
387 second clips. A short 3-5 second segment from 150-380 clips for each object were presented in a random  
388 sequence to the left eye with a 25" LCD monitor positioned ~15cm away from the animal. A small number of  
389 clips were repeated multiple times in order to estimate the reliability of the neural responses.

### 390 ***Decoding and discriminability***

391 We used a one-versus-all logistic regression classifier to estimate the decoding error between the neural  
392 representations of 2-4 objects of 200-500 ms scenes. Each scene was represented as an N-dimensional vector  
393 of neural activity for each response scene. In almost all of the cases we used a 10 fold cross-validation in  
394 which the performance of the decoder was tested on 10% of the data that were held out during training. When  
395 generalizing across the background noise in Figure 3, the decoder was trained on 90% of the data with the  
396 no-background objects and tested on 10% of the data with the background objects. For the generalization  
397 across object parameters in Figure 3 we used a 4 fold cross-validation in which the decoder was trained on  
398 75% of the data , and tested on 25% with a unique parameter range. We converted the decoding error to

399 discriminability, the mutual information (measured in bits) between the true class label  $c$  and its estimate  $\hat{c}$ , by  
400 computing

$$401 \quad MI(c, \hat{c}) = \sum_i \sum_j p_{ij} \log_2 \frac{p_{ij}}{p_i p_j}$$

402 where  $p_{ij}$  is the probability of observing true class  $i$  and predicted class  $j$  and  $p_i$  and  $p_j$  denote the respective  
403 marginal probabilities.

#### 404 ***Classification capacity and geometry of manifolds***

405 An object manifold is defined by the neuronal population responses to an object under different conditions  
406 (i.e. identity-preserving transformations). The ability of a downstream neuron to perform linear classification  
407 of object manifolds depends on the number of objects, denoted  $P$ , and the number of neurons participating in  
408 the representation, denoted  $N$ . *Classification capacity* denotes the critical ratio  $\alpha_c = P/N_c$  where  $N_c$  is the  
409 population size required for a binary classification of  $P$  manifolds to succeed with high probability (Chung et  
410 al., 2018). This capacity can be interpreted as the amount of information about object identity coded per  
411 neuron in the given population. Capacity  $\alpha_c$  depends on the radius of each of the manifolds, denoted  $R_M$ ,  
412 representing the overall extent of variability (relative to the distance between manifolds), and their dimension,  
413 denoted  $D_M$ , representing the number of directions in which this variability is spread. These geometric  
414 measures are defined through the alignment of the hyperplane in the representation  $N$ -dimensional space that  
415 separates positively labelled from negatively labelled manifolds. This hyperplane is uniquely determined by a  
416 set of *anchor points*, one from each manifold, that lie exactly on the separating plane. As the classification  
417 labels are randomly changed, the identity of the anchor points change, and these changes in addition to the  
418 dependence of the hyperplane orientation on the particular position and orientation of the manifolds, give rise  
419 to a statistical distribution of anchor points. Averaging the extent and directional spread of the anchor points  
420 with this distribution determines the manifolds radii and dimensions, respectively. Knowledge of manifold  
421 radius and dimension is sufficient to predict classification capacity using the relation  $\alpha_c = \alpha_{Balls}(R_M, D_M)$   
422 where  $\alpha_{Balls}$  is a closed-form expression describing capacity of  $D$ -dimensional balls of radius  $R$  (Chung et  
423 al., 2018).

424 The separability of manifolds depends not only on their geometries but also on their correlations. For manifold  
425 classification with random binary labeling, clustering of the manifolds in the representational space, as  
426 expected for real-world object representations, hinders their separability, and the theory of manifold  
427 classification has been extended (Cohen et al., 2020) to take these correlations into account in evaluating  $\alpha_c$ .  
428 Here we used the methods and code from (Cohen et al., 2020) to analyze the geometry of the object manifolds  
429 (i.e. manifold radius and dimension) as well as estimate classification capacity of neuronal populations in the  
430 different cortical areas. As those methods depend on the correlation structure of the objects, we analyzed  
431 neural representations for data-sets of 4 objects (i.e. omitted data-sets where only 2 objects are available). At  
432 each session of simultaneously recorded neurons we have sub-sampled from the available population 64  
433 neurons; the subsequent analysis was repeated 10 times with different choices of neurons, and we report the

434 average results across this procedure. Each object manifold is defined by neural responses to an object at  
435 non-overlapping 500ms time windows, using the entire range of nuisance parameter space, as well as  
436 responses with and without background noise. This analysis was performed at each visual area for sessions  
437 where more than 64 neurons are available. The baseline to which classification capacity is compared is the  
438 value expected by structure-less manifold which is  $2/M$ , where  $M$  is the number of samples.

## 439 References

- 440 Andermann, M.L., Kerlin, A.M., Roumis, D.K., Glickfeld, L.L., Reid, R.C., 2011. Functional Specialization  
441 of Mouse Higher Visual Cortical Areas. *Neuron* 72, 1025–1039.  
442 <https://doi.org/10.1016/j.neuron.2011.11.013>
- 443 Bashivan, P., Kar, K., DiCarlo, J.J., 2019. Neural population control via deep image synthesis. *Science* 364,  
444 eaav9436. <https://doi.org/10.1126/science.aav9436>
- 445 Bevins, R.A., Besheer, J., 2006. Object recognition in rats and mice: a one-trial non-matching-to-sample  
446 learning task to study “recognition memory.” *Nature Protocols* 1, 1306.  
447 <https://doi.org/10.1038/nprot.2006.205>
- 448 Blaser, R., Heyser, C., 2015. Spontaneous object recognition: a promising approach to the comparative study  
449 of memory. *Front. Behav. Neurosci.* 9. <https://doi.org/10.3389/fnbeh.2015.00183>
- 450 Brincat, S.L., Siegel, M., Nicolai, C. von, Miller, E.K., 2018. Gradual progression from sensory to task-related  
451 processing in cerebral cortex. *PNAS* 115, E7202–E7211. <https://doi.org/10.1073/pnas.1717075115>
- 452 Chung, S., Lee, D.D., Sompolinsky, H., 2018. Classification and Geometry of General Perceptual Manifolds.  
453 *Physical Review X* 8. <https://doi.org/10.1103/PhysRevX.8.031003>
- 454 Cohen, U., Chung, S., Lee, D.D., Sompolinsky, H., 2020. Separability and geometry of object manifolds in  
455 deep neural networks. *Nature Communications* 11, 746. <https://doi.org/10.1038/s41467-020-14578-5>
- 456 DiCarlo, J.J., Cox, D.D., 2007. Untangling invariant object recognition. *Trends in Cognitive Sciences* 11,  
457 333–341. <https://doi.org/10.1016/j.tics.2007.06.010>
- 458 DiCarlo, J.J., Zoccolan, D., Rust, N.C., 2012. How Does the Brain Solve Visual Object Recognition? *Neuron*  
459 73, 415–434. <https://doi.org/10.1016/j.neuron.2012.01.010>
- 460 Fahey, P.G., Muhammad, T., Smith, C., Froudarakis, E., Cobos, E., Fu, J., Walker, E.Y., Yatsenko, D., Sinz,  
461 F.H., Reimer, J., Tolias, A.S., 2019. A global map of orientation tuning in mouse visual cortex.  
462 *bioRxiv* 745323. <https://doi.org/10.1101/745323>
- 463 Fenno, L.E., Gunaydin, L.A., Deisseroth, K., 2015. Mapping Anatomy to Behavior in Thy1:18 ChR2-YFP  
464 Transgenic Mice Using Optogenetics. *Cold Spring Harb Protoc* 2015, pdb.prot075598.  
465 <https://doi.org/10.1101/pdb.prot075598>
- 466 Froudarakis, E., Berens, P., Ecker, A.S., Cotton, R.J., Sinz, F.H., Yatsenko, D., Saggau, P., Bethge, M., Tolias,  
467 A.S., 2014. Population code in mouse V1 facilitates readout of natural scenes through increased  
468 sparseness. *Nat Neurosci* 17, 851–857. <https://doi.org/10.1038/nn.3707>
- 469 Garrett, M.E., Nauhaus, I., Marshel, J.H., Callaway, E.M., 2014. Topography and Areal Organization of  
470 Mouse Visual Cortex. *J. Neurosci.* 34, 12587–12600.  
471 <https://doi.org/10.1523/JNEUROSCI.1124-14.2014>
- 472 Glickfeld, L.L., Olsen, S.R., 2017. Higher-Order Areas of the Mouse Visual Cortex. *Annual Review of Vision*  
473 *Science* 3, 251–273. <https://doi.org/10.1146/annurev-vision-102016-061331>
- 474 Han, X., Vermaercke, B., Bonin, V., 2018. Segregated encoding of spatiotemporal features in the mouse visual  
475 cortex. *bioRxiv* 441014. <https://doi.org/10.1101/441014>
- 476 Hénaff, O.J., Goris, R.L.T., Simoncelli, E.P., 2019. Perceptual straightening of natural videos. *Nature*  
477 *Neuroscience* 22, 984. <https://doi.org/10.1038/s41593-019-0377-4>
- 478 Hoy, J.L., Yavorska, I., Wehr, M., Niell, C.M., 2016. Vision drives accurate approach behavior during prey  
479 capture in laboratory mice. *Current biology : CB* 26, 3046. <https://doi.org/10.1016/j.cub.2016.09.009>
- 480 Hung, C.P., Kreiman, G., Poggio, T., DiCarlo, J.J., 2005. Fast Readout of Object Identity from Macaque  
481 Inferior Temporal Cortex. *Science* 310, 863–866. <https://doi.org/10.1126/science.1117593>
- 482 Jones, A.G., Ratterman, N.L., 2009. Mate choice and sexual selection: What have we learned since Darwin?  
483 *PNAS* 106, 10001–10008. <https://doi.org/10.1073/pnas.0901129106>
- 484 Kar, K., Kubilius, J., Schmidt, K., Issa, E.B., DiCarlo, J.J., 2019. Evidence that recurrent circuits are critical to  
485 the ventral stream’s execution of core object recognition behavior. *Nature Neuroscience* 22, 974–983.  
486 <https://doi.org/10.1038/s41593-019-0392-5>
- 487 Leger, M., Quiedeville, A., Bouet, V., Haelewyn, B., Boulouard, M., Schumann-Bard, P., Freret, T., 2013.  
488 Object recognition test in mice. *Nat. Protocols* 8, 2531–2537. <https://doi.org/10.1038/nprot.2013.155>
- 489 Lehky, S.R., Kiani, R., Esteky, H., Tanaka, K., 2014. Dimensionality of object representations in monkey  
490 inferotemporal cortex. *Neural Comput.* 26, 2135–2162. [https://doi.org/10.1162/NECO\\_a\\_00648](https://doi.org/10.1162/NECO_a_00648)

- 491 Marshel, J.H., Garrett, M.E., Nauhaus, I., Callaway, E.M., 2011. Functional Specialization of Seven Mouse  
492 Visual Cortical Areas. *Neuron* 72, 1040–1054. <https://doi.org/10.1016/j.neuron.2011.12.004>
- 493 Murgas, K.A., Wilson, A.M., Michael, V., Glickfeld, L.L., 2020. Unique Spatial Integration in Mouse Primary  
494 Visual Cortex and Higher Visual Areas. *J. Neurosci.* 40, 1862–1873.  
495 <https://doi.org/10.1523/JNEUROSCI.1997-19.2020>
- 496 Newport, C., Wallis, G., Siebeck, U.E., 2018. Object recognition in fish: accurate discrimination across novel  
497 views of an unfamiliar object category (human faces). *Animal Behaviour* 145, 39–49.  
498 <https://doi.org/10.1016/j.anbehav.2018.09.002>
- 499 Orlov, T., Zohary, E., 2018. Object Representations in Human Visual Cortex Formed Through Temporal  
500 Integration of Dynamic Partial Shape Views. *J. Neurosci.* 38, 659–678.  
501 <https://doi.org/10.1523/JNEUROSCI.1318-17.2017>
- 502 Pnevmatikakis, E.A., Soudry, D., Gao, Y., Machado, T.A., Merel, J., Pfau, D., Reardon, T., Mu, Y., Lacefield,  
503 C., Yang, W., Ahrens, M., Bruno, R., Jessell, T.M., Peterka, D.S., Yuste, R., Paninski, L., 2016.  
504 Simultaneous Denoising, Deconvolution, and Demixing of Calcium Imaging Data. *Neuron* 89,  
505 285–299. <https://doi.org/10.1016/j.neuron.2015.11.037>
- 506 Ponce, C.R., Xiao, W., Schade, P.F., Hartmann, T.S., Kreiman, G., Livingstone, M.S., 2019. Evolving Images  
507 for Visual Neurons Using a Deep Generative Network Reveals Coding Principles and Neuronal  
508 Preferences. *Cell* 177, 999–1009.e10. <https://doi.org/10.1016/j.cell.2019.04.005>
- 509 Rust, N.C., DiCarlo, J.J., 2010. Selectivity and Tolerance (“Invariance”) Both Increase as Visual Information  
510 Propagates from Cortical Area V4 to IT. *J. Neurosci.* 30, 12978–12995.  
511 <https://doi.org/10.1523/JNEUROSCI.0179-10.2010>
- 512 Smith, I.T., Townsend, L.B., Huh, R., Zhu, H., Smith, S.L., 2017. Stream-dependent development of higher  
513 visual cortical areas. *Nat Neurosci* 20, 200–208. <https://doi.org/10.1038/nn.4469>
- 514 Sofroniew, N.J., Flickinger, D., King, J., Svoboda, K., 2016. A large field of view two-photon mesoscope with  
515 subcellular resolution for in vivo imaging. *eLife Sciences* 5, e14472.  
516 <https://doi.org/10.7554/eLife.14472>
- 517 Soto, F.A., Wasserman, E.A., 2014. Mechanisms of object recognition: what we have learned from pigeons.  
518 *Front Neural Circuits* 8. <https://doi.org/10.3389/fncir.2014.00122>
- 519 Tafazoli, S., Safaai, H., Franceschi, G.D., Rosselli, F.B., Vanzella, W., Riggi, M., Buffolo, F., Panzeri, S.,  
520 Zoccolan, D., 2017. Emergence of transformation-tolerant representations of visual objects in rat  
521 lateral extrastriate cortex. *eLife* 6, e22794. <https://doi.org/10.7554/eLife.22794>
- 522 Tang, H., Buia, C., Madhavan, R., Crone, N.E., Madsen, J.R., Anderson, W.S., Kreiman, G., 2014.  
523 Spatiotemporal Dynamics Underlying Object Completion in Human Ventral Visual Cortex. *Neuron*  
524 83, 736–748. <https://doi.org/10.1016/j.neuron.2014.06.017>
- 525 Tang, H., Schrimpf, M., Lotter, W., Moerman, C., Paredes, A., Caro, J.O., Hardesty, W., Cox, D., Kreiman, G.,  
526 2018. Recurrent computations for visual pattern completion. *PNAS* 201719397.  
527 <https://doi.org/10.1073/pnas.1719397115>
- 528 Vermaercke, B., Gerich, F.J., Ytebrouck, E., Arckens, L., Op de Beeck, H.P., Van den Bergh, G., 2014.  
529 Functional specialization in rat occipital and temporal visual cortex. *Journal of Neurophysiology* 112,  
530 1963–1983. <https://doi.org/10.1152/jn.00737.2013>
- 531 Vermaercke, B., Van den Bergh, G., Gerich, F., Op de Beeck, H., 2015. Neural discriminability in rat lateral  
532 extrastriate cortex and deep but not superficial primary visual cortex correlates with shape  
533 discriminability. *Front. Neural Circuits* 9. <https://doi.org/10.3389/fncir.2015.00024>
- 534 Walker, E.Y., Sinz, F.H., Cobos, E., Muhammad, T., Froudarakis, E., Fahey, P.G., Ecker, A.S., Reimer, J.,  
535 Pitkow, X., Tolias, A.S., 2019. Inception loops discover what excites neurons most using deep  
536 predictive models. *Nat. Neurosci.* 22, 2060–2065. <https://doi.org/10.1038/s41593-019-0517-x>
- 537 Wang, Q., Burkhalter, A., 2013. Stream-Related Preferences of Inputs to the Superior Colliculus from Areas  
538 of Dorsal and Ventral Streams of Mouse Visual Cortex. *J. Neurosci.* 33, 1696–1705.  
539 <https://doi.org/10.1523/JNEUROSCI.3067-12.2013>
- 540 Wang, Q., Burkhalter, A., 2007. Area map of mouse visual cortex. *J. Comp. Neurol* 502, 339–357.  
541 <https://doi.org/10.1002/cne.21286>
- 542 Wang, Q., Gao, E., Burkhalter, A., 2011. Gateways of Ventral and Dorsal Streams in Mouse Visual Cortex. *J.*  
543 *Neurosci.* 31, 1905–1918. <https://doi.org/10.1523/JNEUROSCI.3488-10.2011>
- 544 Wang, Q., Sporns, O., Burkhalter, A., 2012. Network Analysis of Corticocortical Connections Reveals Ventral

- 545 and Dorsal Processing Streams in Mouse Visual Cortex. *J. Neurosci.* 32, 4386–4399.  
546 <https://doi.org/10.1523/JNEUROSCI.6063-11.2012>
- 547 Werner, A., Stürzl, W., Zanker, J., 2016. Object Recognition in Flight: How Do Bees Distinguish between 3D  
548 Shapes? *PLOS ONE* 11, e0147106. <https://doi.org/10.1371/journal.pone.0147106>
- 549 Zoccolan, D., Oertelt, N., DiCarlo, J.J., Cox, D.D., 2009. A rodent model for the study of invariant visual  
550 object recognition. *PNAS* 106, 8748–8753. <https://doi.org/10.1073/pnas.0811583106>
